# Supplementary material for: Brief communication: What do we need to know? Ten questions about climate and water challenges in Berlin-Brandenburg
Source: Copernicus journal article supplement (doi:10.5194/egusphere-2025-428), 2025-04-04
Supplement: Supplementary file 1 [file egusphere-2025-428-supplement.pdf]

# Supplements to brief communication: What do we need to know? Ten questions about climate and water challenges in Berlin-Brandenburg

Pedro Henrique Lima Alencar<sup>1,\*</sup>, Saskia Arndt<sup>2</sup>, Kei Namba<sup>2</sup>, Márk Somogyvári<sup>3</sup>, Frederik Bart<sup>4</sup>, Fabio Brill<sup>3</sup>, Juan Dueñas<sup>6,7</sup>, Peter Feindt<sup>3</sup>, Daniel Johnson<sup>5</sup>, Nariman Mahmoodi<sup>11,12</sup>, Christoph Merz<sup>11</sup>, Subham Mukherjee<sup>18</sup>, Katrin Nissen<sup>19</sup>, Eva Paton<sup>1</sup>, Tobias Sauter<sup>13</sup>, Dörthe Tetzlaff<sup>14,15,3</sup>, Franziska Tügel<sup>16,17</sup>, Thomas Vogelpohl<sup>3</sup>, Stenka Valentinova Vulova<sup>8,9</sup>, Behnam Zamani<sup>10</sup>, and Hui Hui Zhang<sup>13</sup>

<sup>1</sup>Chair of Ecohydrology, Institute of Ecology, Technical University of Berlin, Ernst-Reuter-Platz, 1, 10578 Berlin, Germany

<sup>2</sup>Chair of Landscape Planning and Development, Technische Universität Berlin, Berlin, 10623, Germany

<sup>3</sup>Humboldt-Universität zu Berlin, IRI THESys, Berlin, Germany

<sup>4</sup>Chair of Climatology, Technische Universität Berlin, Berlin, Germany Rothenburgstraße 12, 12165 Berlin

<sup>5</sup>Professor for Value-Based Forest Economy Eberswalde University for Sustainable Development Alfred-Möller-Str. 1, 16225 Eberswalde, Germany

<sup>6</sup>Institute of Biology, Freie Universität Berlin, 14195 Berlin, Germany

<sup>7</sup>Berlin-Brandenburg center of Advanced Biodiversity Research, 14195 Berlin, Germany

<sup>8</sup>Chair of Smart Water Networks, Technische Universität Berlin, Straße des 17. Juni 135, Berlin, 10623, Germany

<sup>9</sup>Geoinformation in Environmental Planning Lab, Department of Landscape Architecture and Environmental Planning, Technische Universität Berlin, Straße des 17. Juni 145, 10623 Berlin, Germany

<sup>10</sup>Water Quality Engineering, Technical University of Berlin, Berlin, Germany

<sup>11</sup>Department of Hydrogeology, Freie University Berlin, Berlin, 12249, Germany

<sup>12</sup>Department of Lowland Hydrology and Water Management, Leibniz Centre for Agricultural Landscape Research (ZALF), Müncheberg, 15374, Germany

<sup>13</sup>Geography Department, Humboldt-Universität zu Berlin, Berlin, 12489, Germany

<sup>14</sup>Leibniz-Institute of Freshwater Ecology and Inland Fisheries, Berlin, Germany

<sup>15</sup>Geography Institute, Humboldt University of Berlin, Berlin, Germany

<sup>16</sup>Department of Water Resources, Faculty of Geo-Information Science and Earth Observation, University of Twente, PO Box 217, 7500 AE Enschede, The Netherlands

<sup>17</sup>Water Engineering and Management, Faculty of Engineering Technology, University of Twente, PO Box 217, 7500 AE Enschede, The Netherlands

<sup>18</sup>Physische Geographie, Freie Universität Berlin, Malteserstr. 74-100, Haus H, Raum H 137, 12249 Berlin

<sup>19</sup>Klimadiagnostik und meteorologische Extremereignisse, Freie Universität Berlin, Carl-Heinrich-Becker-Weg 6-10 12165 Berlin

**Correspondence:** Pedro Henrique Lima Alencar (pedro.alencar@campus.tu-berlin.de)

## 1 Proposed questions

The table below contains all 48 questions presented in the questionnaire during phase S2 (See Methods section in the main text).

Table S1: Complete list of proposed questions on the topic of Climate and Water for the Berlin-Brandenburg region. Highlighted questions were found the most relevant.

| No.       | Question                                                                                                                                                                                                                | Category                                     |
|-----------|-------------------------------------------------------------------------------------------------------------------------------------------------------------------------------------------------------------------------|----------------------------------------------|
| 1         | What are the possible/feasible local adaptation measures to improve resilience against climate extremes?                                                                                                                | 1 - Climate adaptation and resilience        |
| 2         | How to adapt forests to risks of drought/heat (damage, pests, fires)? Which tree species (increasing biodiversity) and management strategies should be used so that they can provide the ecosystem services we require? | 1 - Climate adaptation and resilience        |
| 3         | How can we ensure an equitable contribution of both urban and rural areas in terms of adaptation?                                                                                                                       | 1 - Climate adaptation and resilience        |
| <b>4</b>  | <b>How can ecosystems and agriculture adapt to extended drought periods expected in the future?</b>                                                                                                                     | <b>1 - Climate adaptation and resilience</b> |
| 5         | What strategies do stakeholders in Spreewald think are important to deal with challenges of climate change impacts, governance and coal-phase out and how could these strategies be implemented?                        | 1 - Climate adaptation and resilience        |
| 6         | How can we foster a paradigm shift and create new forms of discourse on how to deal with water, rather than just focusing on technical solutions and individual water-saving measures?                                  | 1 - Climate adaptation and resilience        |
| 7         | What are the possible impacts of water abstraction restriction measures in the events of drought?                                                                                                                       | 1 - Climate adaptation and resilience        |
| <b>8</b>  | <b>What changes in management and policy can make the Spree more resilient to droughts?</b>                                                                                                                             | <b>1 - Climate adaptation and resilience</b> |
| 9         | How to sustainably transition Brandenburg agricultural sector towards irrigated fields?                                                                                                                                 | 1 - Climate adaptation and resilience        |
| 10        | What is the impact of forest management on droughts?                                                                                                                                                                    | 1 - Climate adaptation and resilience        |
| <b>11</b> | <b>What are the possible scenarios for the Spree catchment and the city of Berlin after the mining phaseout in the Lausitz and the accelerating climate emergency?</b>                                                  | <b>2 - Water management</b>                  |
| 12        | What management strategies should be implemented to allow emergency irrigation to mitigate crop losses during dry/hot summer periods (e.g. dry spells and flash droughts)?                                              | 2 - Water management                         |

|           |                                                                                                                                                                                                                                                           |                             |
|-----------|-----------------------------------------------------------------------------------------------------------------------------------------------------------------------------------------------------------------------------------------------------------|-----------------------------|
| <b>13</b> | <b>What management strategies can be adopted to cope with water scarcity periods?</b>                                                                                                                                                                     | <b>2 - Water management</b> |
| 14        | How to assess the immediate and legacy economic and ecosystemic impacts of large development projects (e.g. Tesla factory)?<br>How to balance its benefits and estimate mitigation costs?                                                                 | 2 - Water management        |
| 15        | How to optimize and improve the current water resources monitoring system (ground water, soil water, lakes and rivers)?                                                                                                                                   | 2 - Water management        |
| 16        | When do conflicts emerge between actors in the Berlin-Brandenburg (urban-rural) dipole? Which discourses and ideas are behind these conflicts?                                                                                                            | 2 - Water management        |
| 17        | How can administrations effectively manage the challenges of climate change in water management despite a lack of resources (personnel, time and money)?                                                                                                  | 2 - Water management        |
| 18        | How can we tackle the issue of increased water shortage after the coal-phase out in Lausitz region as articulated in the UBA study?                                                                                                                       | 2 - Water management        |
| 19        | How can cross-federal states negotiation between Berlin-Brandenburg-Saxony regarding water sharing of the Spree river be more legitimate, effective, and transparent?                                                                                     | 2 - Water management        |
| 20        | How can integrated water resources management be better implemented despite a number of challenges (such as focus on status quo, lack of personnel (+bureaucracy), lack of communication, strong specialisation of governance leads to fragmented plans)? | 2 - Water management        |
| 21        | How can we align the multiplicity and different meanings of water (urban vs. rural, across different sectors and users etc.) and better understand the interconnectedness?                                                                                | 2 - Water management        |
| 22        | How human-induced activities mitigate or accelerate the impacts of drought on the Spree river basin?                                                                                                                                                      | 2 - Water management        |
| 23        | What are the impacts of irrigation on water resources? How will it change under climate change and increasing demand for water?                                                                                                                           | 2 - Water management        |

|           |                                                                                                                                                                                                   |                                                   |
|-----------|---------------------------------------------------------------------------------------------------------------------------------------------------------------------------------------------------|---------------------------------------------------|
| 24        | How can climate change impacts and adaptation in water-related planning be systematically integrated across different sectors and federal states?                                                 | 2 - Water management                              |
| 25        | How do we balance regional economic development (Tesla creating a large number of jobs in the region) backed by politics and the protection of water resources (located in a water reserve area)? | 2 - Water management                              |
| 26        | What would be the alternative water resources in the events of drought? (apart from the current plans to transfer water from the Elbe)                                                            | 2 - Water management                              |
| 27        | Can catchment level drought impact database assist on local drought monitoring systems?                                                                                                           | 2 - Water management                              |
| 28        | How global and regional scale models connect/inform local issues and conditions?                                                                                                                  | 2 - Water management                              |
| <b>29</b> | <b>What is the feasibility of a multi-sector impact-based drought monitoring and forecast be implement</b>                                                                                        | <b>3 - Technological solutions and innovation</b> |
| 30        | Can AI improve the water management in urban areas? Can an AI integrated household water management system assist on mitigation of water shortages?                                               | 3 - Technological solutions and innovation        |
| <b>31</b> | <b>To what extent can NBS (nature-based solutions) be implemented in Berlin (urban) and Brandenburg (rural) to increase resilience and community awareness?</b>                                   | <b>3 - Technological solutions and innovation</b> |
| 32        | Is emergency irrigation a feasible solution for dry extremes? To what extent and with what impacts can it be implemented?                                                                         | 3 - Technological solutions and innovation        |
| 33        | What are the potential off-site interventions that would result in positive feedbacks in Berlin?                                                                                                  | 3 - Technological solutions and innovation        |
| 34        | What are the threats to privacy rights on big data models for environmental analysis?                                                                                                             | 3 - Technological solutions and innovation        |
| <b>35</b> | <b>What other regions have experienced such drastic changes in river flow and what were the long-term impacts? What can we learn from it?</b>                                                     | <b>4 - Past, present, and future impacts</b>      |
| 36        | How other locations that experienced sudden changes in river flow coped with it? How is the Spree case similar/different?                                                                         | 4 - Past, present, and future impacts             |

|           |                                                                                                                                                                                   |                                              |
|-----------|-----------------------------------------------------------------------------------------------------------------------------------------------------------------------------------|----------------------------------------------|
| 37        | What is the legacy effect of early landscape management in Brandenburg on ecosystems?                                                                                             | 4 - Past, present, and future impacts        |
| 38        | What are the vulnerabilities of historical water management equipments (dikes, channels, drainage, etc) under climate change and land use change scenarios?                       | 4 - Past, present, and future impacts        |
| <b>39</b> | <b>How climate change has affected and will affect the multiple users of the water systems in BBR?</b>                                                                            | <b>4 - Past, present, and future impacts</b> |
| 40        | When are the breakpoints of the ability-to-supply multiple users in BBR (drinking water, landscaping, agriculture, leisure)?                                                      | 4 - Past, present, and future impacts        |
| 41        | Why are issues of the river Spree are part of a larger scale/inter-regional problem and where do we need to implement mitigation measures to effectively cope with them?          | 4 - Past, present, and future impacts        |
| 42        | How to include impacts on other-than-human habitats and living conditions on drought forecasting?                                                                                 | 4 - Past, present, and future impacts        |
| <b>43</b> | <b>How can individual and community perception of extreme events improve our impact assessment and monitoring?</b>                                                                | <b>5 - Governance and public awareness</b>   |
| 44        | When will the greater public realize that we are facing an era of water shortages?                                                                                                | 5 - Governance and public awareness          |
| 45        | Is the institutional set-up (e.g. AG FGB = Arbeitsgruppe Flussgebietsbewirtschaftung) for water sharing of the Spree still suited for dealing with current and future challenges? | 5 - Governance and public awareness          |
| 46        | How can we avoid trade-offs/conflicts and promote harmonisation of targets and indicators across strategies?                                                                      | 5 - Governance and public awareness          |
| 47        | What is the role of academia in increasing community awareness to climate and environmental changes?                                                                              | 5 - Governance and public awareness          |
| <b>48</b> | <b>Can co-creation assist integration between science and administration to face climate change challenges?</b>                                                                   | <b>5 - Governance and public awareness</b>   |

## 2 Selection process

- 5 After all answers to the questionnaire were collected (S2), a *relevance score* weighted calculated as the weighted average. The best-scoring questions from each category were selected. In Figure S1.

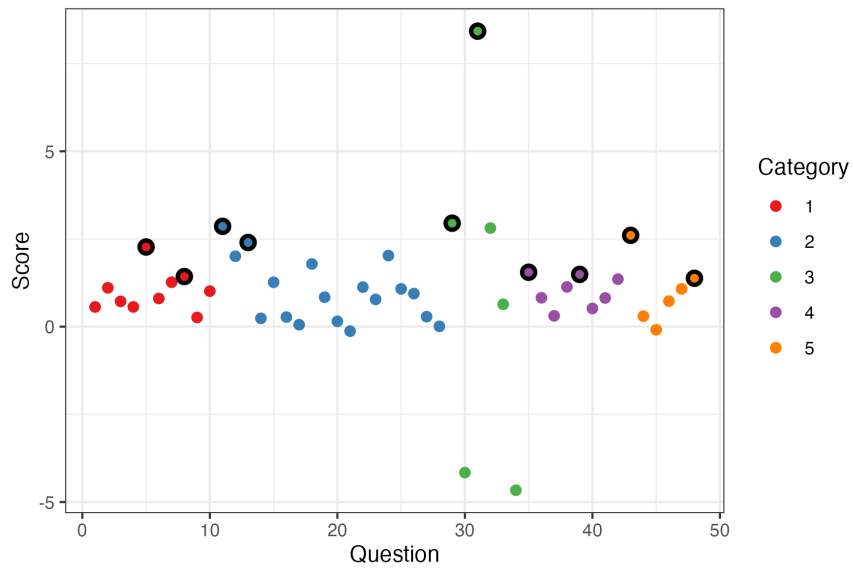

**Figure S1.** Questions score. Highlighted points indicate the selected questions (two best scoring from each category).

## References
